# Supplementary material
Source: PubMed Central journal article supplement (PMC6143082)
Supplement: jamapsychiatry-e181471-s001.pdf [file jamapsychiatry-e181471-s001.pdf]

## Supplementary Online Content

Olfson M, Crystal S, Wall MM, Wang S, Liu S-M, Blanco C. Causes of death after nonfatal opioid overdose. *JAMA Psychiatry*. Published June 20, 2018.  
doi:10.1001/jamapsychiatry.2018.1471

**eAppendix 1.** ICD-10 Codes – Selected Causes of Death Groups

**eAppendix 2.** Diseases and ICD-9-CM Codes included in Elixhauser Comorbidity Index

**eTable.** All causes and selected causes of crude mortality rates and standardized mortality ratios for adult Medicaid patients during the first year following a nonfatal opioid overdose by low or moderate to high Elixhauser comorbidity score

This supplementary material has been provided by the authors to give readers additional information about their work.

| <b>eAppendix 1 - ICD-10 Codes – Selected Causes of Death Groups</b>                                                |                                                                                                                                                                                                                                                                                                                          |
|--------------------------------------------------------------------------------------------------------------------|--------------------------------------------------------------------------------------------------------------------------------------------------------------------------------------------------------------------------------------------------------------------------------------------------------------------------|
| External causes <sup>A</sup>                                                                                       | X60-X84, Y87.0, X85-Y09, Y87.1, V01-X39, X46-X59, Y85-Y86                                                                                                                                                                                                                                                                |
| Suicide                                                                                                            | X60-X84, Y87.0                                                                                                                                                                                                                                                                                                           |
| Homicide                                                                                                           | X85-Y09, Y87.1                                                                                                                                                                                                                                                                                                           |
| Accidents                                                                                                          | V01-X39, X46-X59, Y85-Y86                                                                                                                                                                                                                                                                                                |
| Substance-related <sup>B</sup>                                                                                     | F11.0-F11.5, F11.7-F11.9, F12.0-F12.5, F12.7-F12.9, F13.0-F13.5, F13.7-F13.9, F14.0-F14.4, F14.7-F14.9, F15.0-F15.5, F15.7-F15.9, F16.0-F16.5, F16.7-F16.9, F17.0, F17.3-F17.5, F17.7-F17.9, F18.0-F18.5, F18.7-F18.9, F19.0-F19.5, F19.7-F19.9, X40–X44, Y10–Y14, F10, G31.2, G62.1, I42.6, K29.2, K70, R78.0, X45, Y15 |
| Drug-related                                                                                                       | F11.0-F11.5, F11.7-F11.9, F12.0-F12.5, F12.7-F12.9, F13.0-F13.5, F13.7-F13.9, F14.0- F14.4, F14.7-F14.9, F15.0-F15.5, F15.7-F15.9, F16.0-F16.5, F16.7-F16.9, F17.0, F17.3-F17.5, F17.7-F17.9, F18.0-F18.5, F18.7-F18.9, F19.0-F19.5, F19.7-F19.9, X40–X44, Y10–Y14                                                       |
| Alcohol-related                                                                                                    | F10, G31.2, G62.1, I42.6, K29.2, K70, R78.0, X45, Y15                                                                                                                                                                                                                                                                    |
| Infectious                                                                                                         | A00-B99                                                                                                                                                                                                                                                                                                                  |
| Viral hepatitis                                                                                                    | B15-B19                                                                                                                                                                                                                                                                                                                  |
| HIV                                                                                                                | B20-B24                                                                                                                                                                                                                                                                                                                  |
| Circulatory system                                                                                                 | I00-I99                                                                                                                                                                                                                                                                                                                  |
| Respiratory system                                                                                                 | J00-J98                                                                                                                                                                                                                                                                                                                  |
| Influenza & pneumonia                                                                                              | J09-J18                                                                                                                                                                                                                                                                                                                  |
| Chronic respiratory disease                                                                                        | J40-J47                                                                                                                                                                                                                                                                                                                  |
| Digestive system                                                                                                   | K00-K92                                                                                                                                                                                                                                                                                                                  |
| Cirrhosis & alcoholic liver disease                                                                                | K73-74, K70                                                                                                                                                                                                                                                                                                              |
| Cancers                                                                                                            | C00-D48                                                                                                                                                                                                                                                                                                                  |
| Note: <sup>A</sup> Excluding substance-related causes; <sup>B</sup> Excluding suicide and homicide related-causes. |                                                                                                                                                                                                                                                                                                                          |

| eAppendix 2. Diseases and ICD-9-CM Codes included in Elixhauser Comorbidity Index |                                                                                                                                                                                                                                                                                   |
|-----------------------------------------------------------------------------------|-----------------------------------------------------------------------------------------------------------------------------------------------------------------------------------------------------------------------------------------------------------------------------------|
| Diseases                                                                          | ICD-9-CM Codes                                                                                                                                                                                                                                                                    |
| Congestive heart failure                                                          | 398.91, 402.01, 402.11, 402.91, 404.01, 404.03, 404.11, 404.13, 404.91, 404.93, 425.4, 425.5, 425.7, 425.8, 425.9, 428.                                                                                                                                                           |
| Cardiac Arrhythmia                                                                | 426.0, 426.13, 426.7, 426.9, 426.10, 426.12, 4270, 4271, 4272, 4273, 4274, 4276, 4278, 4279, 7850, 99601, 99604, V450, V533                                                                                                                                                       |
| Valvular Disease                                                                  | 093.2, 394, 395, 396, 397, 424, 746.3, 746.4, 746.5, 746.6, V42.2, V43.3                                                                                                                                                                                                          |
| Pulmonary Circulation Disorders                                                   | 415.0, 415.1, 416, 417.0, 417.8, 417.9                                                                                                                                                                                                                                            |
| Peripheral Vascular Disorders                                                     | 093.0, 437.3, 440, 441, 443.1, 443.2, 443.8, 443.9, 447.1, 557.1, 557.9, V434                                                                                                                                                                                                     |
| Hypertension Uncomplicated                                                        | 401                                                                                                                                                                                                                                                                               |
| Hypertension Complicated                                                          | 402, 403, 404, 405                                                                                                                                                                                                                                                                |
| Paralysis                                                                         | 334.1, 342, 343, 344.0, 344.1, 344.2, 344.3, 344.4, 344.5, 344.6, 344.9                                                                                                                                                                                                           |
| Other Neurological Disorders                                                      | 331.9, 332.0, 332.1, 333.4, 333.5, 333.92, 334, 335, 336.2, 340, 341, 345, 348.1, 348.3, 780.3, 784.3                                                                                                                                                                             |
| Chronic Pulmonary Disease                                                         | 416.8, 416.9, 490, 491, 492, 493, 494, 495, 496, 500, 501, 502, 503, 504, 505, 506.4, 508.1, 508.8                                                                                                                                                                                |
| Diabetes Uncomplicated                                                            | 250.0, 250.1, 250.2, 250.3                                                                                                                                                                                                                                                        |
| Diabetes Complicated                                                              | 250.4, 250.5, 250.6, 250.7, 250.8, 250.9                                                                                                                                                                                                                                          |
| Hypothyroidism                                                                    | 240.9, 243, 244, 246.1, 246.8                                                                                                                                                                                                                                                     |
| Renal Failure                                                                     | 403.01, 403.11, 403.91, 404.02, 404.03, 404.12, 404.13, 404.92, 404.93, 585, 586, 588.0, V42.0, V45.1, V56                                                                                                                                                                        |
| Liver Disease                                                                     | 070.22, 070.23, 070.32, 070.33, 070.44, 070.54, 070.6, 070.9, 456.0, 456.1, 456.2, 570, 571, 572.2, 572.3, 572.4, 572.8, 573.3, 573.4, 573.8, 573.9, V42.7                                                                                                                        |
| Peptic Ulcer Disease excluding bleeding                                           | 531.7, 531.9, 532.7, 532.9, 533.7, 533.9, 534.7, 534.9                                                                                                                                                                                                                            |
| AIDS/HIV                                                                          | 042, 043, 044                                                                                                                                                                                                                                                                     |
| Lymphoma                                                                          | 200, 201, 202, 203.0, 238.6                                                                                                                                                                                                                                                       |
| Metastatic Cancer                                                                 | 196, 197, 198, 199                                                                                                                                                                                                                                                                |
| Solid Tumor without Metastasis                                                    | 140, 141, 142, 143, 144, 145, 146, 147, 148, 149, 150, 151, 152, 153, 154, 155, 156, 157, 158, 159, 160, 161, 162, 163, 164, 165, 166, 167, 168, 169, 170, 171, 172, 174, 175, 176, 177, 178, 179, 180, 181, 182, 183, 184, 185, 186, 187, 188, 189, 190, 191, 192, 193, 194, 195 |
| Rheumatoid Arthritis/collagen                                                     | 446, 701.0, 710.0, 710.1, 710.2, 710.3, 710.4, 710.8, 710.9, 711.2, 714, 719.3, 720, 725, 728.5, 728.89, 729.30                                                                                                                                                                   |
| Coagulopathy                                                                      | 286, 287.1, 287.3, 287.4, 287.5                                                                                                                                                                                                                                                   |
| Obesity                                                                           | 2780                                                                                                                                                                                                                                                                              |
| Weight Loss                                                                       | 260, 261, 262, 263, 783.2, 799.4                                                                                                                                                                                                                                                  |
| Fluid and Electrolyte Disorders                                                   | 253.6, 276                                                                                                                                                                                                                                                                        |
| Blood Loss Anemia                                                                 | 280.0                                                                                                                                                                                                                                                                             |
| Deficiency Anemia                                                                 | 280.1, 280.8, 280.9, 281                                                                                                                                                                                                                                                          |
| Alcohol Abuse                                                                     | 265.2, 291.1, 291.2, 291.3, 291.5, 291.8, 291.9, 303.0, 303.9, 305.0, 357.5, 425.5, 535.3, 571.0, 571.1, 571.2, 571.3, 980, V11.3                                                                                                                                                 |
| Drug Abuse                                                                        | 292, 304, 305.2, 305.3, 305.4, 305.5, 305.6, 305.7, 305.8, 305.9, V65.42                                                                                                                                                                                                          |
| Psychoses                                                                         | 293.8, 295, 296.04, 296.14, 296.44, 296.54, 297, 298                                                                                                                                                                                                                              |
| Depression                                                                        | 296.2, 296.3, 296.5, 300.4, 309, 311                                                                                                                                                                                                                                              |
| From (16).                                                                        |                                                                                                                                                                                                                                                                                   |

eTable. All causes and selected causes of crude mortality rates and standardized mortality ratios for adult Medicaid patients during the first year following a nonfatal opioid overdose by low or moderate to high Elixhauser comorbidity score

| Cause of death                      | Low Elixhauser Score |                                              |                                                | Moderate to High Elixhauser Score |                                              |                                                |
|-------------------------------------|----------------------|----------------------------------------------|------------------------------------------------|-----------------------------------|----------------------------------------------|------------------------------------------------|
|                                     | Observed Deaths (n)  | Crude Mortality Rate per 10,000 person-years | Standardized Mortality Rate Ratio <sup>A</sup> | Observed Deaths (n)               | Crude Mortality Rate per 10,000 person-years | Standardized Mortality Rate Ratio <sup>A</sup> |
| All causes                          | 569 (100)            | 416.8                                        | 21.4 (19.7-23.2)                               | 4625 (100)                        | 871.2                                        | 31.2 (30.3-32.1)                               |
| External causes                     | 55 (9.7)             | 40.3                                         | 9.9 (7.5-12.8)                                 | 293 (6.3)                         | 55.2                                         | 17.7 (15.8-19.8)                               |
| Suicide                             | 34 (6.0)             | 24.9                                         | 21.6 (15.2-29.8)                               | 181 (3.9)                         | 34.1                                         | 119.2 (102.8-137.6)                            |
| Homicide                            | 4 (0.7)              | 2.9                                          | 4.3 (1.4-10.4)                                 | 20 (4.3)                          | 3.8                                          | 6.2 (3.9-9.4)                                  |
| Accidents                           | 17 (3.0)             | 12.5                                         | 5.6 (3.4-8.8)                                  | 92 (2.0)                          | 17.3                                         | 7.8 (6.3-9.5)                                  |
| Substance-related                   | 254 (44.6)           | 186.1                                        | 94.4 (83.3-106.5)                              | 1109 (24.0)                       | 208.9                                        | 84.6 (79.7-89.7)                               |
| Drug-related                        | 246 (43.2)           | 180.2                                        | 137.8 (121.4-155.9)                            | 1054 (22.8)                       | 198.5                                        | 134.0 (126.1-142.0)                            |
| Alcohol-related                     | 8 (1.4)              | 5.9                                          | 8.8 (4.1-16.7)                                 | 55 (1.2)                          | 10.4                                         | 10.5 (8.0-13.6)                                |
| Infectious                          | 14 (2.5)             | 10.3                                         | 8.0 (4.6-13.1)                                 | 300 (6.5)                         | 56.5                                         | 29.5 (26.3-33.0)                               |
| Viral hepatitis                     | 3 (0.5)              | 2.2                                          | 13.7 (3.5-37.3)                                | 46 (9.9)                          | 8.7                                          | 33.7 (25.0-44.6)                               |
| HIV                                 | 7 (1.2)              | 5.1                                          | 10.7(4.7-21.2)                                 | 172 (3.7)                         | 32.4                                         | 53.8 (46.2-62.3)                               |
| Circulatory system                  | 68 (12.0)            | 49.8                                         | 9.5 (7.4-12.0)                                 | 621 (13.4)                        | 117                                          | 13.2 (12.2-14.3)                               |
| Respiratory system                  | 26 (4.6)             | 19                                           | 20.2 (13.5-29.2)                               | 295 (6.4)                         | 55.6                                         | 33.9 (30.2-37.9)                               |
| Influenza & pneumonia               | 7 (1.2)              | 5.1                                          | 23.6 (10.3-46.7)                               | 46 (1.0)                          | 8.7                                          | 24.2 (17.9-32.0)                               |
| Chronic respiratory disease         | 16 (2.8)             | 11.7                                         | 25.0 (14.8-39.7)                               | 206 (4.5)                         | 38.8                                         | 44.4 (38.6-50.8)                               |
| Digestive system                    | 12 (2.1)             | 8.8                                          | 7.4 (4.0-12.6)                                 | 175 (3.8)                         | 33                                           | 17.4 (15.0-20.1)                               |
| Cirrhosis & alcoholic liver disease | 5 (0.9)              | 3.7                                          | 5.6 (2.1-12.4)                                 | 96 (2.1)                          | 18.1                                         | 17.5 (14.2-21.3)                               |
| Cancers                             | 13 (2.3)             | 9.5                                          | 1.7 (0.9-2.8)                                  | 523 (11.3)                        | 98.5                                         | 10.0 (9.2-10.9)                                |

<sup>A</sup> CDC WONDER data age, sex, race/ethnicity standardized to nonfatal opioid overdose cohort.
